# Supplementary material for: Replication of Rift Valley Fever Virus in Amphibian and Reptile-Derived Cell Lines
Source: MDPI journal article supplement (doi:10.3390/pathogens10060681), 2021-05-31
Supplement: s1 [file s1]

**Table S1. Cytopathogenic effects**

**MP-12**

|               | <i>MaKo</i> | <i>TH-1</i> | <i>IgH-2</i> | <i>A6</i> | <i>SKM</i> | <i>VH-2</i> | <i>Vero76</i> | <i>CDSK</i> |
|---------------|-------------|-------------|--------------|-----------|------------|-------------|---------------|-------------|
| <i>6 hpi</i>  | -           | -           | -            | -         | -          | -           | -             | -           |
| <i>12 hpi</i> | -           | -           | -            | -         | -          | -           | -             | -           |
| <i>24 hpi</i> | -           | -           | -            | -         | -          | -           | -             | -           |
| <i>48 hpi</i> | -           | -           | +            | +         | -          | -           | +             | -           |
| <i>72 hpi</i> | +           | +           | +            | +         | -          | +           | +             | -           |

**Clone 13**

|               | <i>MaKo</i> | <i>TH-1</i> | <i>IgH-2</i> | <i>A6</i> | <i>SKM</i> | <i>VH-2</i> | <i>BHK-21</i> | <i>CDSK</i> |
|---------------|-------------|-------------|--------------|-----------|------------|-------------|---------------|-------------|
| <i>6 hpi</i>  | -           | -           | -            | -         | -          | -           | -             | -           |
| <i>12 hpi</i> | -           | -           | -            | -         | -          | -           | -             | -           |
| <i>24 hpi</i> | -           | -           | -            | -         | -          | -           | -             | -           |
| <i>48 hpi</i> | -           | -           | -            | -         | -          | -           | -             | -           |
| <i>72 hpi</i> | -           | +           | -            | -         | -          | -           | +             | -           |

**ZH501**

|               | <i>MaKo</i> | <i>TH-1</i> | <i>IgH-2</i> | <i>A6</i> | <i>SKM</i> | <i>VH-2</i> | <i>VeroE6</i> | <i>CDSK</i> |
|---------------|-------------|-------------|--------------|-----------|------------|-------------|---------------|-------------|
| <i>6 hpi</i>  | -           | -           | -            | -         | -          | -           | -             | -           |
| <i>12 hpi</i> | -           | -           | -            | -         | -          | -           | -             | -           |
| <i>24 hpi</i> | -           | -           | -            | -         | -          | -           | -             | -           |
| <i>48 hpi</i> | -           | +           | +            | -         | -          | -           | +             | +           |
| <i>72 hpi</i> | -           | +           | +            | -         | -          | +           | +             | +           |

Cytopathogenic effects were evaluated at the according time points after infection before petri dishes were frozen. Infected cells were compared to corresponding mock-infected cells, that were treated and kept in the same way like infected cells.

**Figure S1. Immunofluorescence assay**

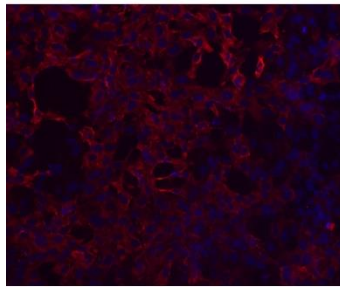

Cell: TH-1  
Infected with Clone 13  
72 hpi  
anti-NP staining

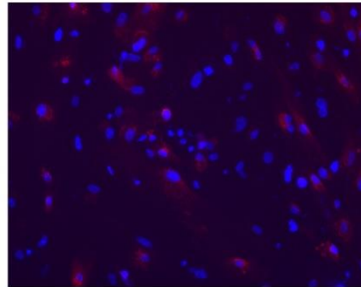

Cell: MaKo  
Infected with MP-12  
72 hpi  
anti-Gn staining

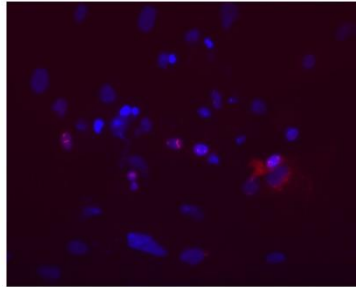

Cell: MaKo  
Infected with MP-12  
72 hpi  
anti-NSs staining

Images of RVFV immunofluorescence assay are depicted for two different cell lines and staining for three different antigens. Cells are depicted at a 100x magnitude.

**Figure S2. Temperature dependent growth of cell lines Vero76, IgH-2 and A6**

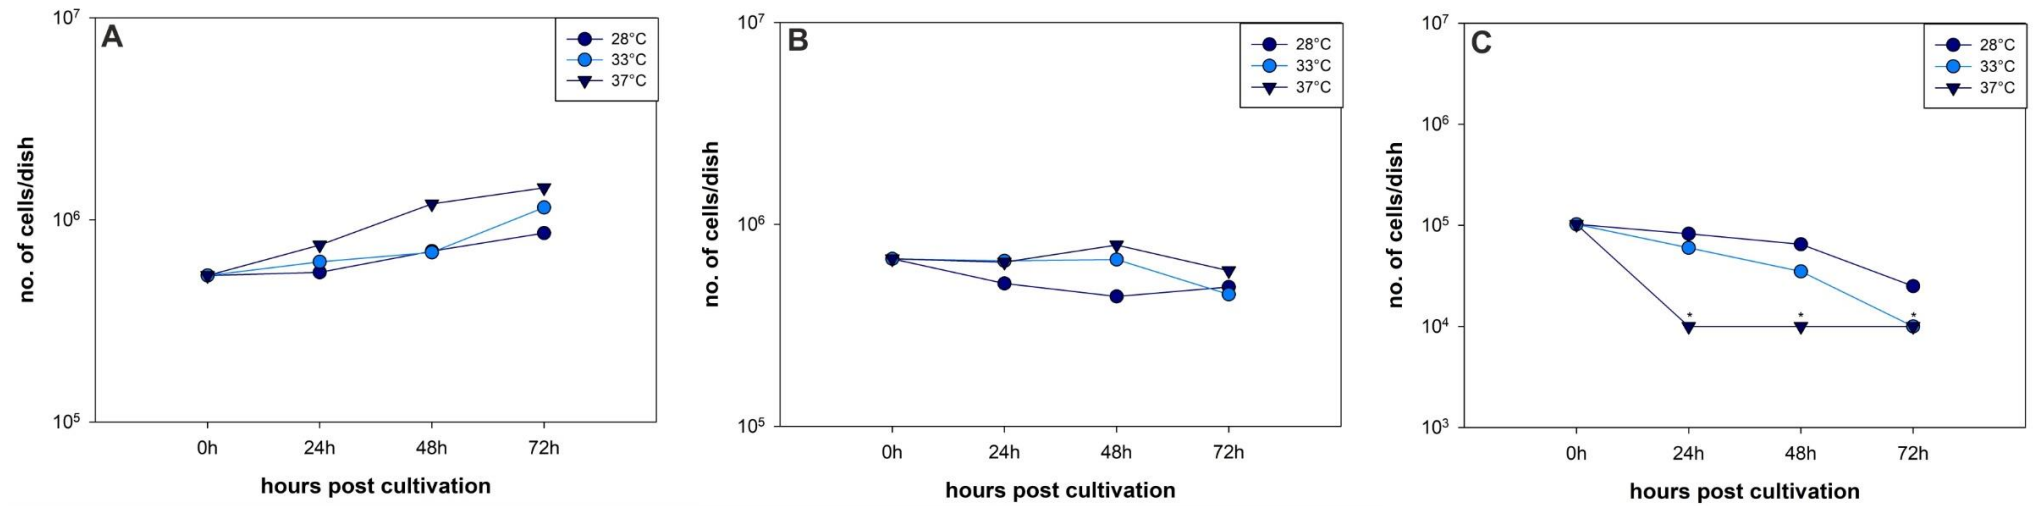

Number of cells per dish at different time points after cultivation and at different temperatures of incubation are presented for Vero76 (A), IgH-2 (B) and A6 (C).

\* number of cells  $\leq 10^4$  cells/dish (limit of countable cells).
