# Supplementary material for: Replication of Rift Valley Fever Virus in Amphibian and Reptile-Derived Cell Lines
Source: MDPI journal article supplement (doi:10.3390/pathogens10060681), 2021-05-31
Supplement: s1 [file s1]

**Table S1. Cytopathogenic effects**

| <b>MP-12</b>    |             |             |              |           |            |             |               |             |
|-----------------|-------------|-------------|--------------|-----------|------------|-------------|---------------|-------------|
|                 | <i>MaKo</i> | <i>TH-1</i> | <i>IgH-2</i> | <i>A6</i> | <i>SKM</i> | <i>VH-2</i> | <i>Vero76</i> | <i>CDSK</i> |
| <i>6hpi</i>     | -           | -           | -            | -         | -          | -           | -             | -           |
| <i>12hpi</i>    | -           | -           | -            | -         | -          | -           | -             | -           |
| <i>24hpi</i>    | -           | -           | -            | -         | -          | -           | -             | -           |
| <i>48hpi</i>    | -           | -           | +            | +         | -          | -           | +             | -           |
| <i>72hpi</i>    | +           | +           | +            | +         | -          | +           | +             | -           |
| <b>Clone 13</b> |             |             |              |           |            |             |               |             |
|                 | <i>MaKo</i> | <i>TH-1</i> | <i>IgH-2</i> | <i>A6</i> | <i>SKM</i> | <i>VH-2</i> | <i>BHK-21</i> | <i>CDSK</i> |
| <i>6hpi</i>     | -           | -           | -            | -         | -          | -           | -             | -           |
| <i>12hpi</i>    | -           | -           | -            | -         | -          | -           | -             | -           |
| <i>24hpi</i>    | -           | -           | -            | -         | -          | -           | -             | -           |
| <i>48hpi</i>    | -           | -           | -            | -         | -          | -           | -             | -           |
| <i>72hpi</i>    | -           | +           | -            | -         | -          | -           | +             | -           |
| <b>ZH501</b>    |             |             |              |           |            |             |               |             |
|                 | <i>MaKo</i> | <i>TH-1</i> | <i>IgH-2</i> | <i>A6</i> | <i>SKM</i> | <i>VH-2</i> | <i>VeroE6</i> | <i>CDSK</i> |
| <i>6hpi</i>     | -           | -           | -            | -         | -          | -           | -             | -           |
| <i>12hpi</i>    | -           | -           | -            | -         | -          | -           | -             | -           |
| <i>24hpi</i>    | -           | -           | -            | -         | -          | -           | -             | -           |
| <i>48hpi</i>    | -           | +           | +            | -         | -          | -           | +             | +           |
| <i>72hpi</i>    | -           | +           | +            | -         | -          | +           | +             | +           |

Cytopathogenic effects were evaluated at the according time points after infection before petri dishes were frozen. Infected cells were compared to corresponding mock-infected cells, that were treated and kept in the same way like infected cells.
